# Supplementary material for: Combining hydrogen bonding and metal coordination for controlling topochemical [2 + 2] cycloaddition from multi-component assemblies
Source: Royal Society of Chemistry journal article supplement (doi:10.1039/b815149k), 2009-01-01
Supplement: b815149k.pdf [file b815149k.pdf]

## Supplementary Material

---

### Combining hydrogen bonding and metal coordination for controlling topochemical [2+2] cycloaddition from multi-component assemblies.

---

Alexander Briceño, \*<sup>a</sup> Yennifer Hill,<sup>a</sup> Teresa González<sup>a</sup> and Graciela Díaz de Delgado.<sup>b</sup>

<sup>a</sup>Instituto Venezolano de Investigaciones Científicas (IVIC), Apartado 21827, Caracas 1020-A, Venezuela. E-mail: [abriceno@ivic.ve](mailto:abriceno@ivic.ve); Fax: +58-212-5041350; Tel: +58-212-5041320.

<sup>b</sup>Universidad de Los Andes (ULA), Facultad de Ciencias, Departamento de Química, Apartado 40, La Hechicera, Mérida 5251, Venezuela.

#### 1. List of Figures

**Figure S1.** <sup>1</sup>H NMR spectrum of the *rctt*-4,4'-tpcb isomer obtained from the photoreaction of compound **2**.

**Figure S2.** <sup>1</sup>H NMR spectrum of the *rctt*-4,4'-tpcb isomer obtained from the photoreaction of compound **3**.

**Figure S3.** <sup>1</sup>H NMR spectrum of the *rctt*-4,4'-tpcb isomer obtained from the photoreaction of compound **4**.

**Figure S4.** (a) <sup>1</sup>H NMR spectrum of the *rctt*-4,4'-tpcb isomer obtained from the photoreaction of the desolvated crystals of **5**. (b) <sup>1</sup>H NMR spectrum of the photoproducts obtained from the photoreaction of compound **5** in its mother-liquor.

**Figure S1.**  $^1\text{H}$  NMR spectrum of the *rctt*-4,4'-tpcb isomer obtained from the photoreaction of compound **2**.

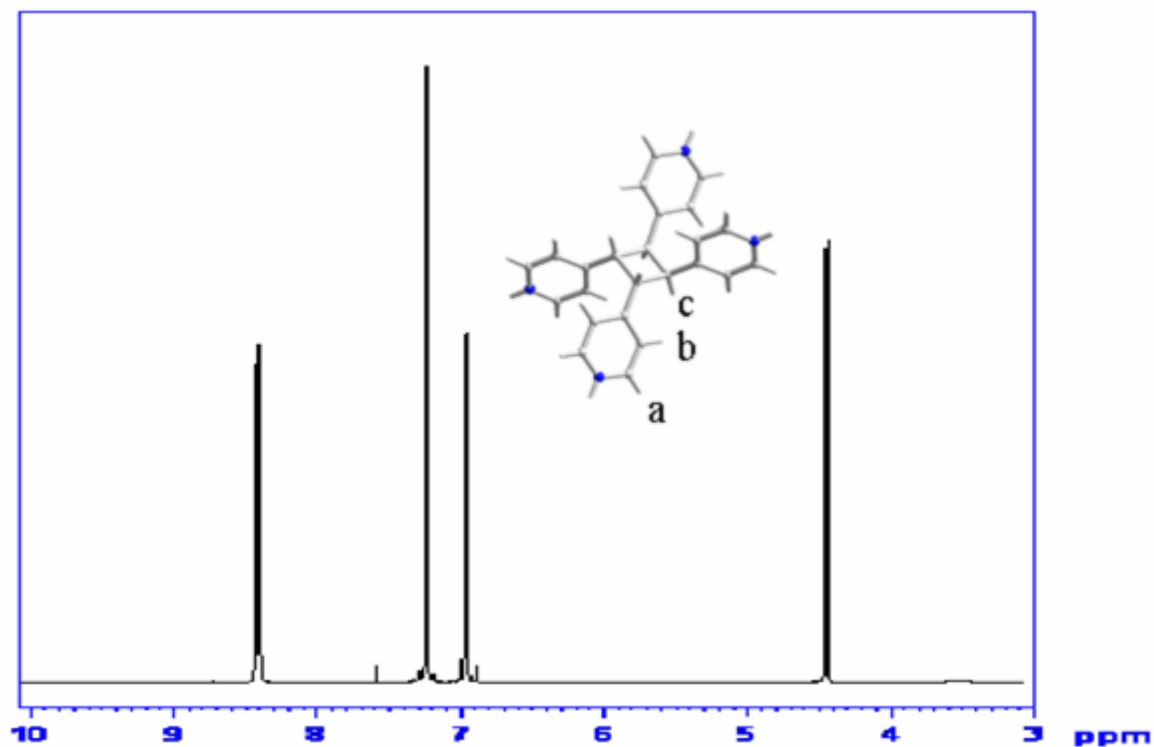

**Figure S2.**  $^1\text{H}$  NMR spectrum of the *rctt*-4,4'-tpcb isomer obtained from the photoreaction of compound **3**.

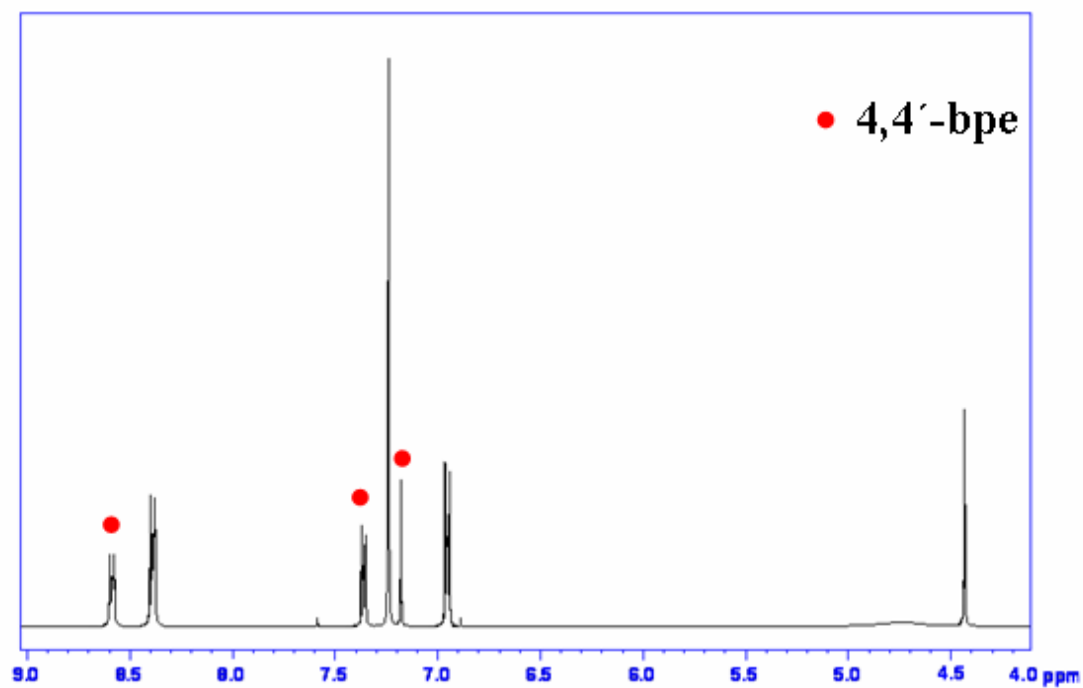

**Figure S3.**  $^1\text{H}$  NMR spectrum of the *rctt*-4,4'-tpcb isomer obtained from the photoreaction of compound **4**.

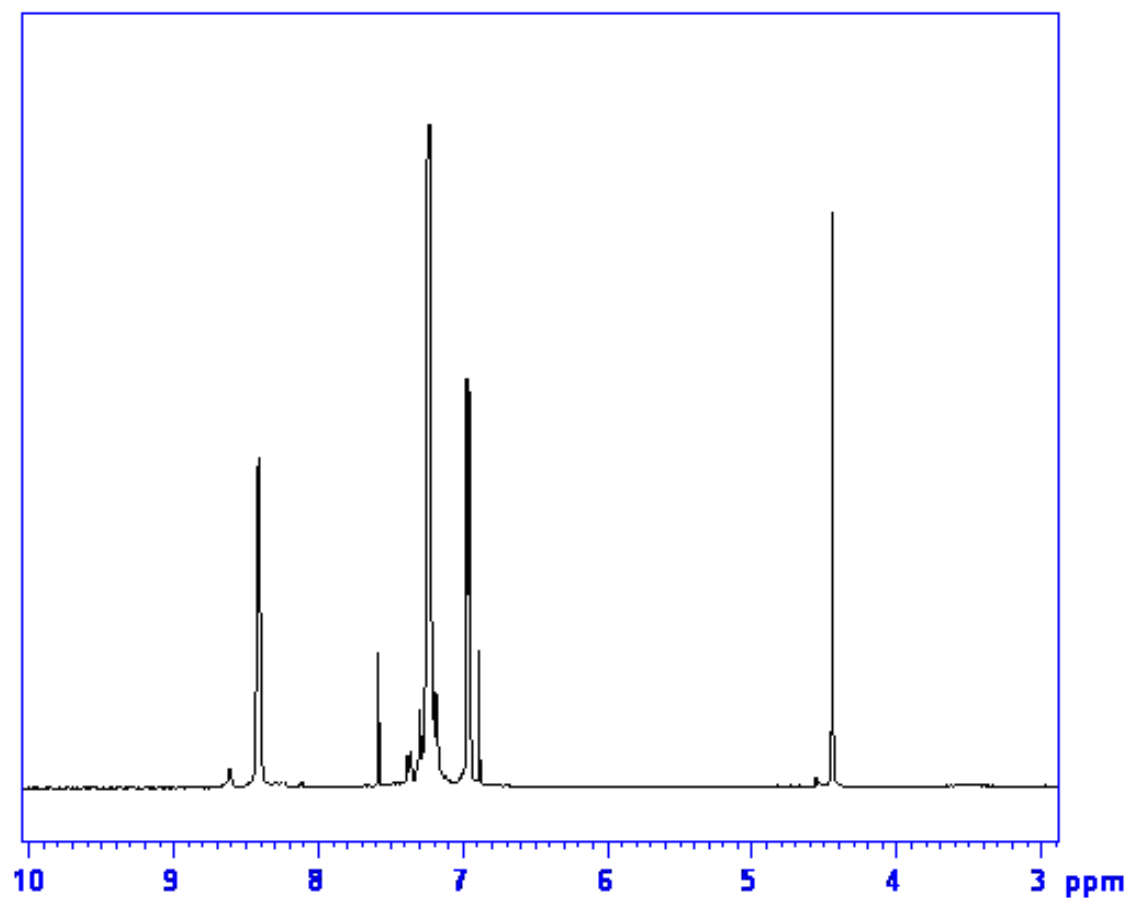

**Figure S4.** (a)  $^1\text{H}$  NMR spectrum of the *rctt*-4,4'-tpcb isomer obtained from the photoreaction of the desolvated crystals of **5**. (b)  $^1\text{H}$  NMR spectrum of the photoproducts obtained from the photoreaction of compound **5** in its mother-liquor.

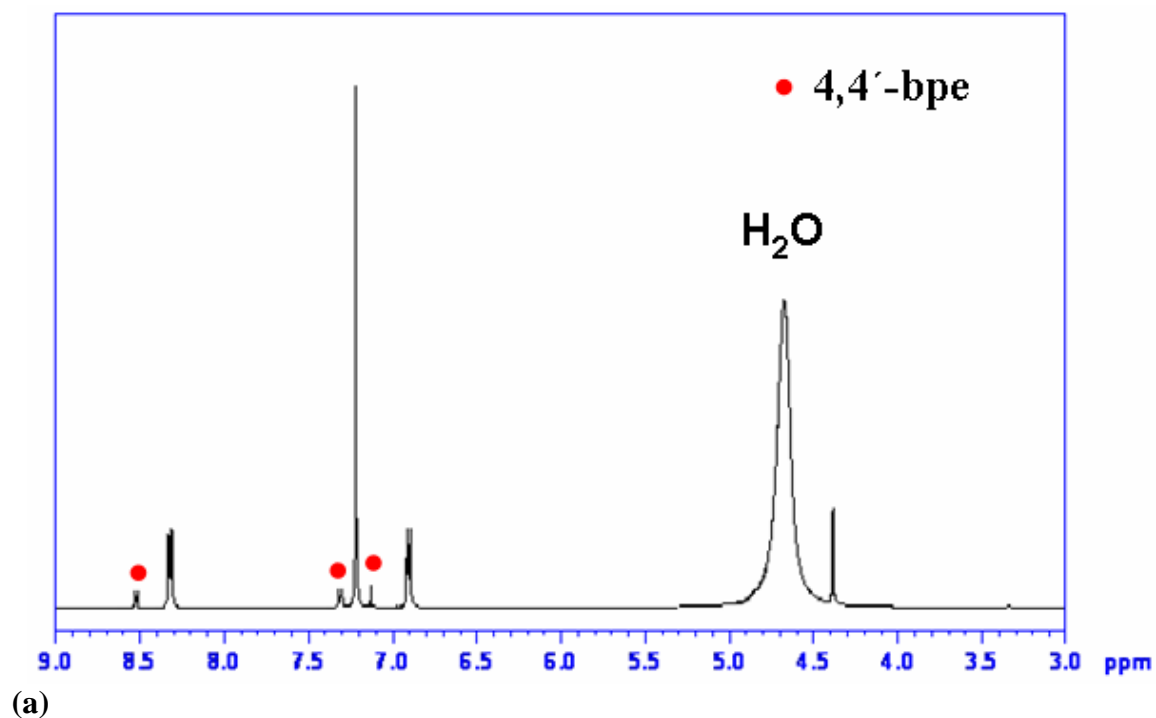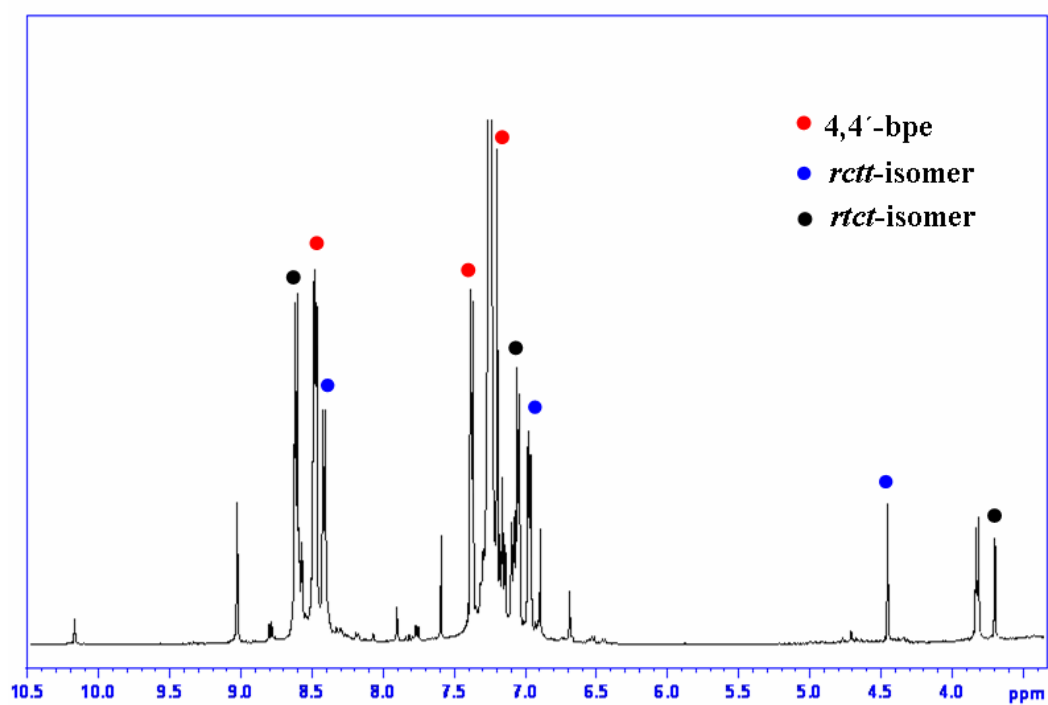

(b)
